# Supplementary material for: Exploring d-xylose oxidation in Saccharomyces cerevisiae through the Weimberg pathway
Source: PubMed Central journal article supplement (PMC5838027; doi:10.1186/s13568-018-0564-9), 2018-03-05

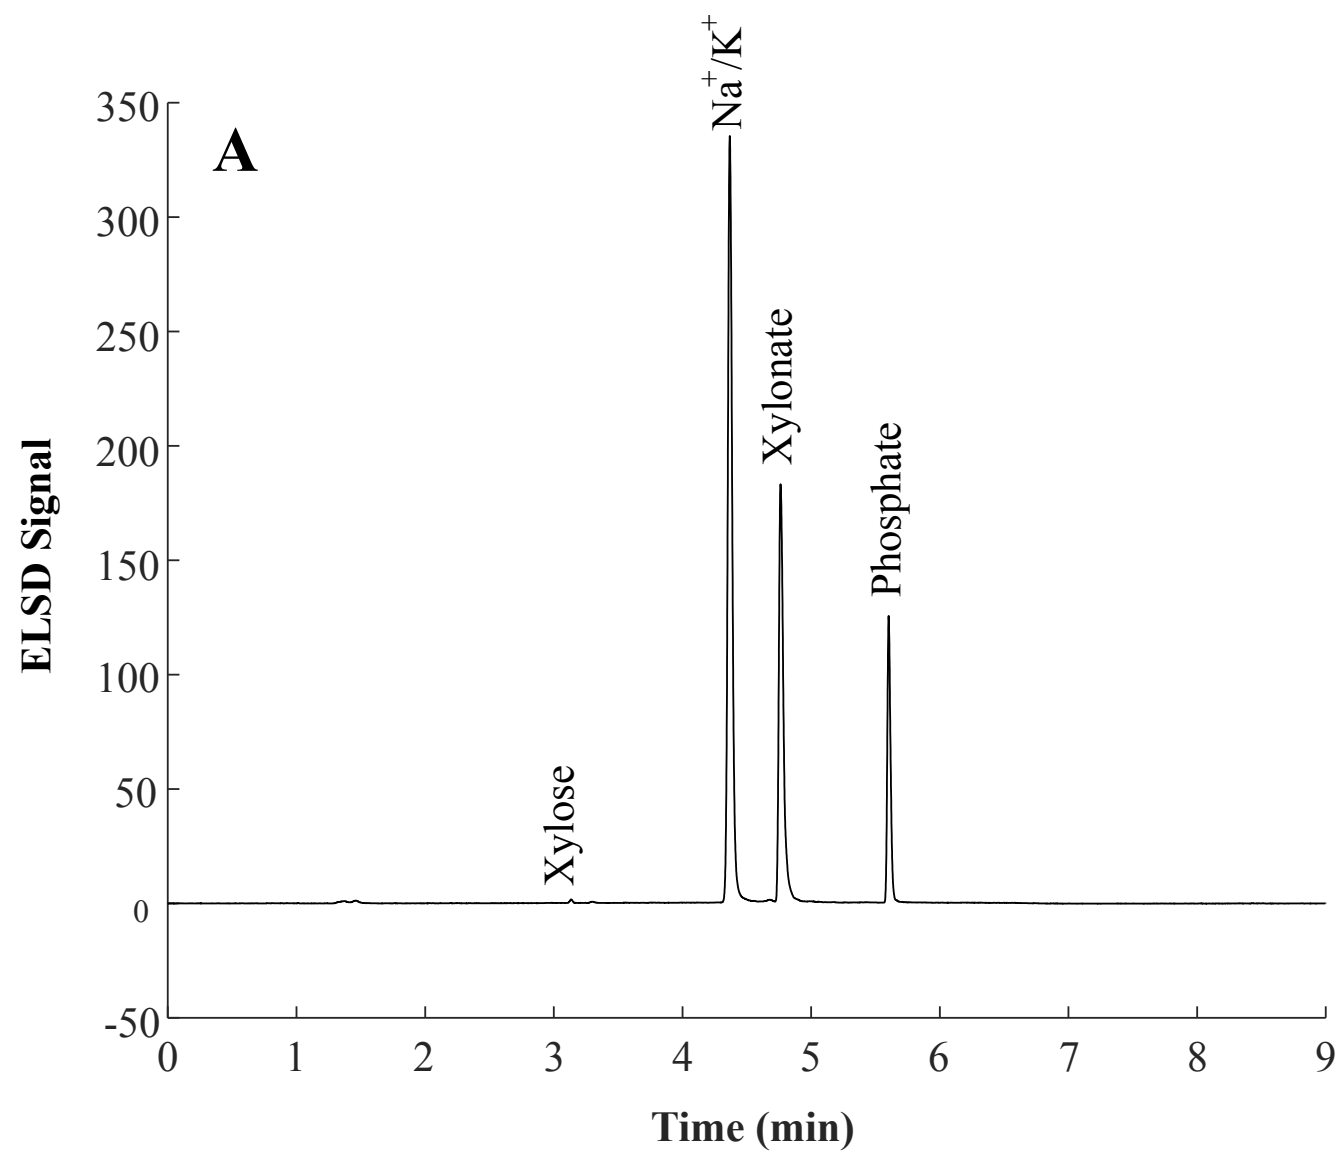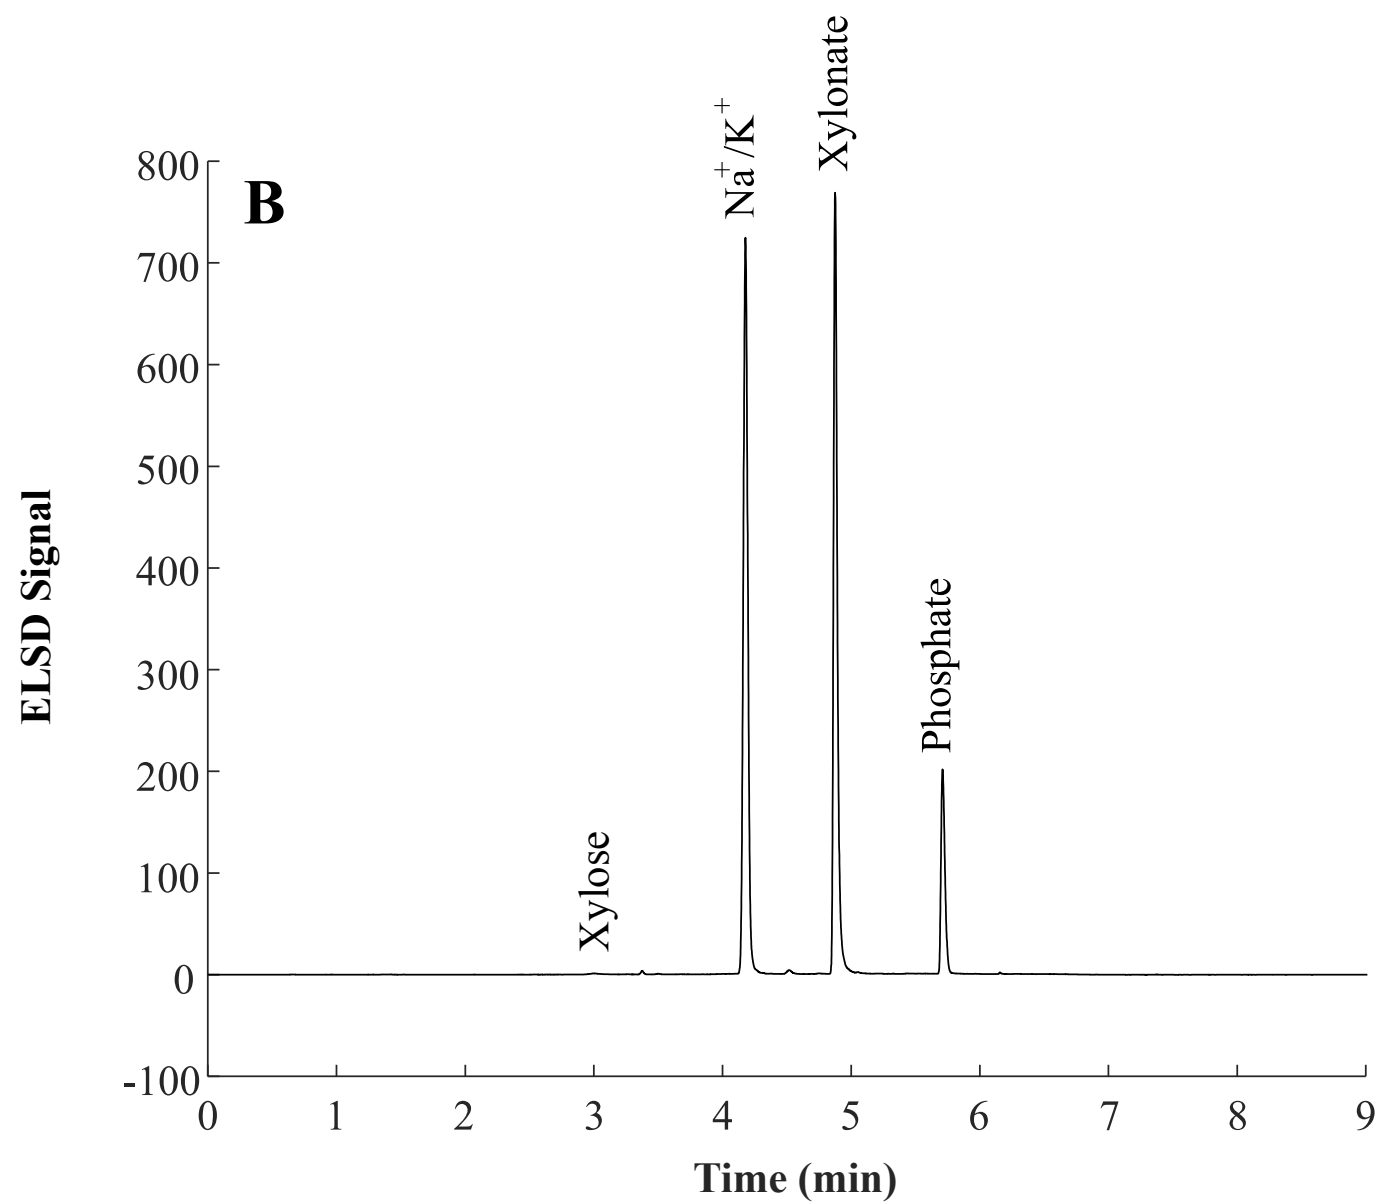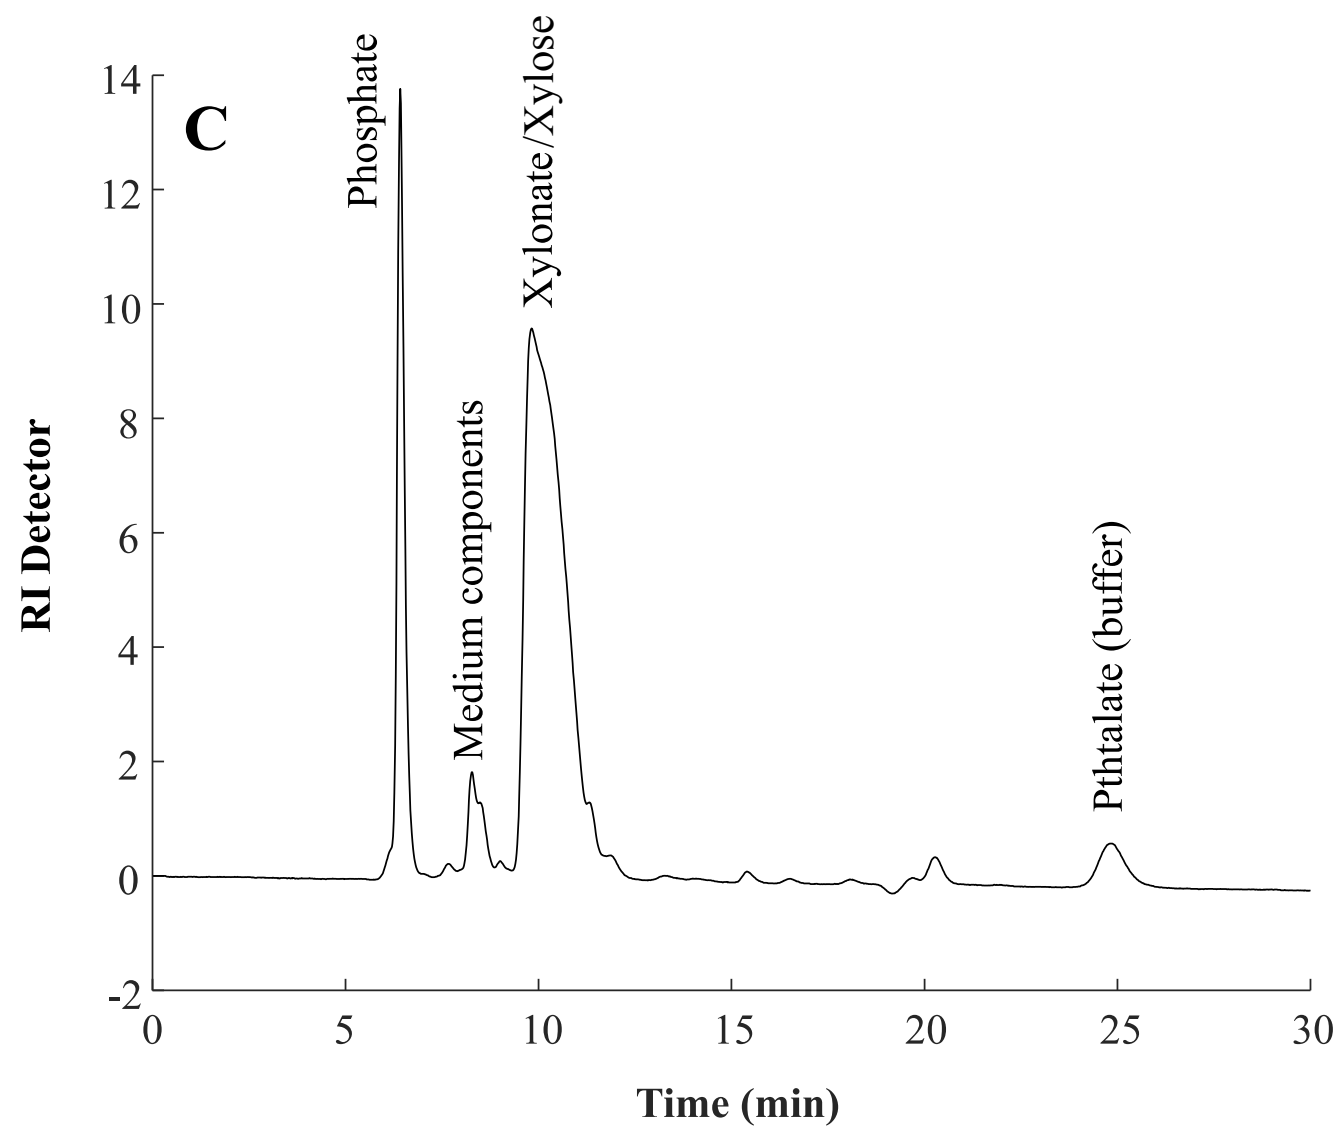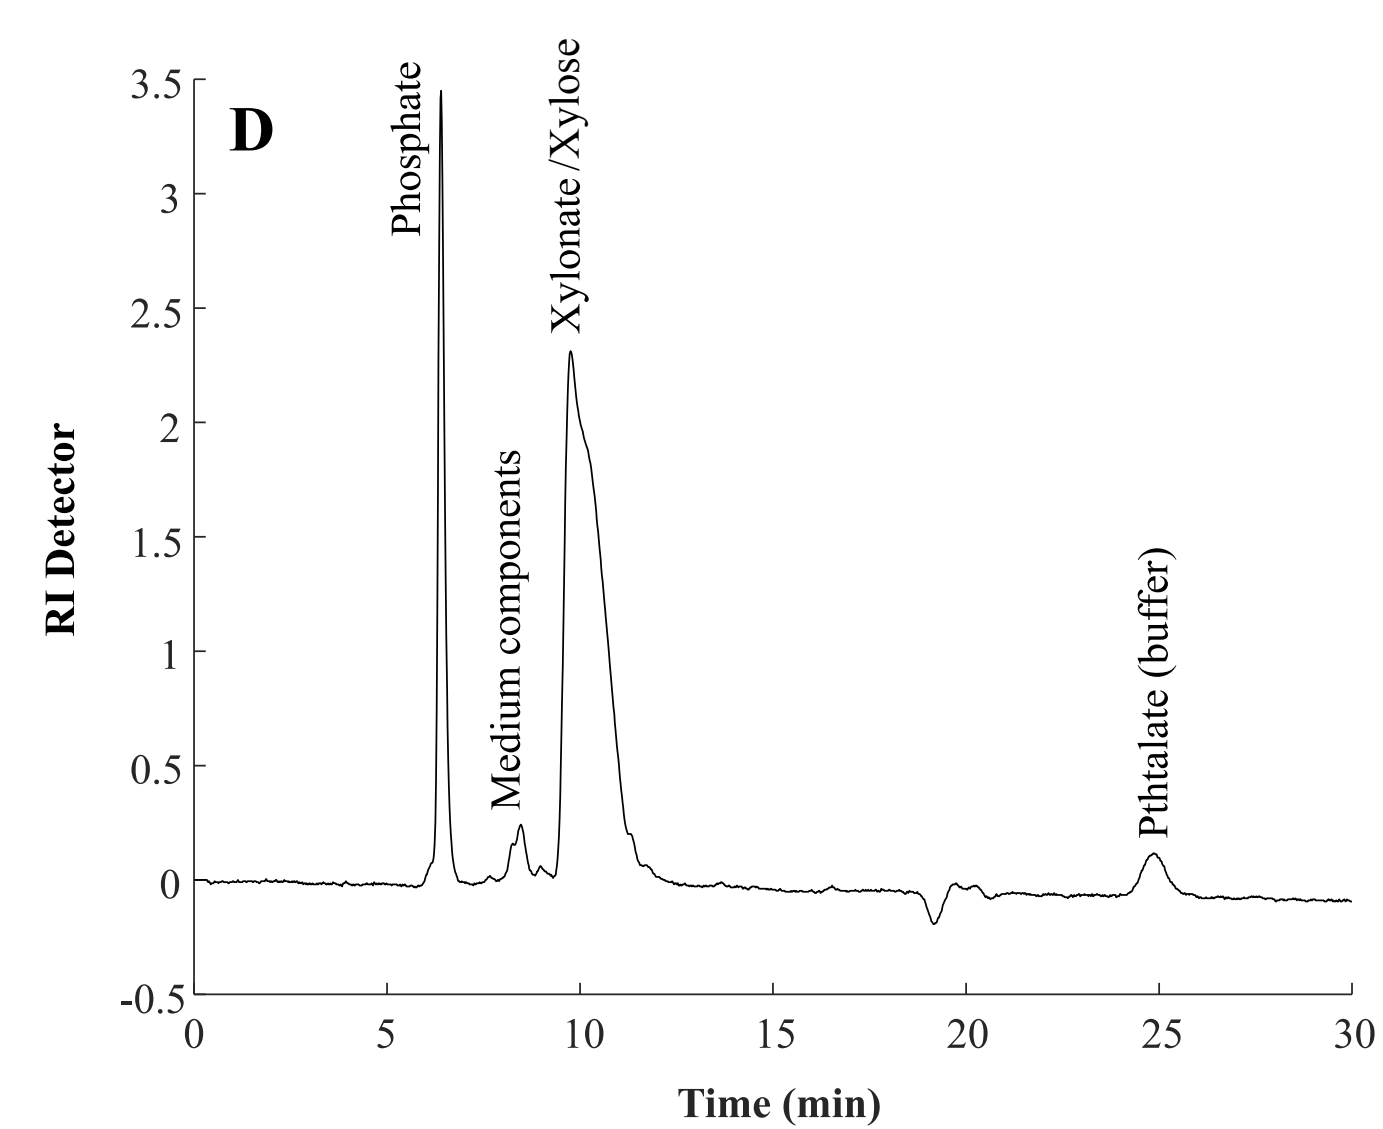

Supplement: 13568_2018_564_MOESM3_ESM.pdf [file 13568_2018_564_MOESM3_ESM.pdf]
